# Supplementary material for: Histological evaluation of five suture materials in the telson ligament of the American horseshoe crab ( Limulus polyphemus )
Source: PeerJ journal article supplement (doi:10.7717/peerj.7061), 2019-08-01
Supplement: HCrab_Histo.pdf [file HCrab_Histo.pdf]

ATTACHED PAPERS

- Please note and return.
- Return with recommendations.
- For your records/information.
- Speak to me concerning.
- Please handle.
- For your approval/signature.
- Please reply, sending me a copy.

MEMORANDUM

To Shane

I checked over these <sup>Linalus (HC)</sup> samples. I would remove the suture, then bisect the tissue, through the ~~suture~~ suture hole area, in longitudinal plane:

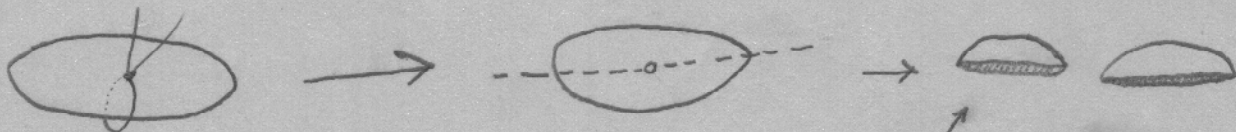

↙  
Hist lab can embed the tissue,  
cut surface down, so we see the  
cut surface area & sutured area.

Date 9/23/09

Signed: MacLain
