# Supplementary material for: Histological evaluation of five suture materials in the telson ligament of the American horseshoe crab (Limulus polyphemus)
Source: PeerJ. 2019 Aug 1;7:e7061. doi: 10.7717/peerj.7061 (PMC6679907; doi:10.7717/peerj.7061)
Supplement: Supplemental Information 2 — Information on the animals, sampling times, and results from the five sutures tested. [file peerj-07-7061-s002.xlsx]

## Sheet: Sheet1
Horseshoe Crab ID #	suture type	# of days post suturing bx taken	Reaction Observed	Comments
					Mean	SD	Range
2	silk	6	0		1.25	1.89297
7	silk	6	4	encysted parasite noted
12	silk	12	1
17	silk	12	0
3	PDS II	6	0		2	1.63299
8	PDS II	6	4
13	PDS II	12	2
18	PDS II	12	2
4	monofyl	6	4		2.25	2.06155
9	monofyl	6	0	shallow bx
14	monofyl	6	4
19	monofyl	12	1
21	webcryl	6	2		1.5	0.57735
24	webcryl	6	1
25	webcryl	12	2
28	webcryl	12	1
22	mono-nylon	6	1	section pulled apart	1.25	0.957427
23	mono-nylon	6	0	shallow bx
26	mono-nylon	12	2
27	mono-nylon	12	2
